# Supplementary material for: Extended structural materials composed of transition-metal-substituted arsenicniobates and their photocatalytic activity
Source: Royal Society of Chemistry journal article supplement (doi:10.1039/c5ra08262e), 2015-01-01
Supplement: c5ra08262e1.pdf [file c5ra08262e1.pdf]

**Extended Structural Materials Composed of Transition-Metal-Substituted Arsenicniobates and Their Photocatalytic Activity**

Qing Lan,<sup>a</sup> Zhi-Ming Zhang,<sup>\*a</sup> Yang-Guang Li,<sup>a</sup> and En-Bo Wang<sup>\*a</sup>

*<sup>a</sup>Key laboratory of Polyoxometalate Science of Ministry of Education, Department of Chemistry, Northeast Normal University, Renmin Street No.5268, Changchun, Jilin, 130024, P. R. China.*

*E-mail: zhangzm178@nenu.edu.cn (Z. M. Zhang), wangeb889@nenu.edu.cn (E. B. Wang)*

**Table S1.** Bond valence sum calculations of compound **1**.<sup>S1,S2</sup>

| Bonds              | Bond length (Å) | BVS   | Bonds              | Bond length (Å) | BVS   |
|--------------------|-----------------|-------|--------------------|-----------------|-------|
| V(1)-O(14)         | 1.617(9)        | 1.570 | V(2)-O(33)         | 1.623(9)        | 1.545 |
| V(1)-O(8)          | 1.920(8)        | 0.691 | V(2)-O(19)         | 1.924(8)        | 0.685 |
| V(1)-O(6)          | 1.923(8)        | 0.687 | V(2)-O(26)         | 1.927(8)        | 0.679 |
| V(1)-O(16)         | 2.025(8)        | 0.521 | V(2)-O(13)         | 1.986(9)        | 0.579 |
| V(1)-O(3)          | 2.041(8)        | 0.499 | V(2)-O(37)         | 2.030(9)        | 0.514 |
| $V_{V(1)} = 3.968$ |                 |       | $V_{V(2)} = 4.002$ |                 |       |
| V(3)-O(41)         | 1.620(9)        | 1.558 | V(4)-O(34)         | 1.618(9)        | 1.566 |
| V(3)-O(24)         | 1.903(9)        | 0.725 | V(4)-O(10)         | 1.923(8)        | 0.725 |
| V(3)-O(2)          | 1.915(8)        | 0.702 | V(4)-O(5)          | 1.936(8)        | 0.702 |
| V(3)-O(22)         | 2.005(8)        | 0.550 | V(4)-O(12)         | 2.005(9)        | 0.550 |
| V(3)-O(9)          | 2.027(8)        | 0.519 | V(4)-O(7)          | 2.017(9)        | 0.519 |
| $V_{V(3)} = 4.054$ |                 |       | $V_{V(4)} = 4.062$ |                 |       |

**Table S2.** Bond valence sum calculations of compound **2**.<sup>S1,S2</sup>

| Bonds              | Bond length (Å) | BVS   | Bonds              | Bond length (Å) | BVS   |
|--------------------|-----------------|-------|--------------------|-----------------|-------|
| V(1)-O(13)         | 1.633(8)        | 1.501 | V(2)-O(9)          | 1.644(9)        | 1.460 |
| V(1)-O(10)         | 1.955(10)       | 0.630 | V(2)-O(12)#1       | 1.957(11)       | 0.627 |
| V(1)-O(6)          | 1.978(10)       | 0.592 | V(2)-O(15)         | 1.969(11)       | 0.607 |
| V(1)-O(2)          | 1.981(9)        | 0.587 | V(2)-O(7)          | 1.995(11)       | 0.565 |
| V(1)-O(8)          | 1.992(10)       | 0.570 | V(2)-O(3)#1        | 2.001(9)        | 0.556 |
| V(1)-O(22)#1       | 2.444(13)       | 0.168 | V(2)-O(21)#1       | 2.420(13)       | 0.179 |
| V(1)-O(24)         | 2.461(14)       | 0.160 |                    |                 |       |
| $V_{V(1)} = 4.208$ |                 |       | $V_{V(2)} = 3.994$ |                 |       |
| V(3)-O(16)         | 1.627(10)       | 1.529 | V(4)-O(1)          | 1.617(9)        | 1.570 |
| V(3)-O(10)         | 1.946(11)       | 0.645 | V(4)-O(2)          | 1.945(9)        | 0.647 |
| V(3)-O(6)          | 1.947(10)       | 0.644 | V(4)-O(3)          | 1.954(9)        | 0.632 |
| V(3)-O(7)          | 1.950(9)        | 0.638 | V(4)-O(8)          | 1.956(10)       | 0.628 |
| V(3)-O(15)         | 1.951(12)       | 0.637 | V(4)-O(12)         | 1.960(11)       | 0.621 |
| $V_{V(3)} = 4.093$ |                 |       | $V_{V(4)} = 4.098$ |                 |       |

S1. The valence sum calculations are performed on a program of bond valence calculator, version 2.00 February **1993**, written by C. Hormillosa, with assistance from S. Healy, distributed by I. D. Brown.

S2. Brown, I. D.; Altermatt, D. *Acta Crystallogr.* **1985**, B41, 244.

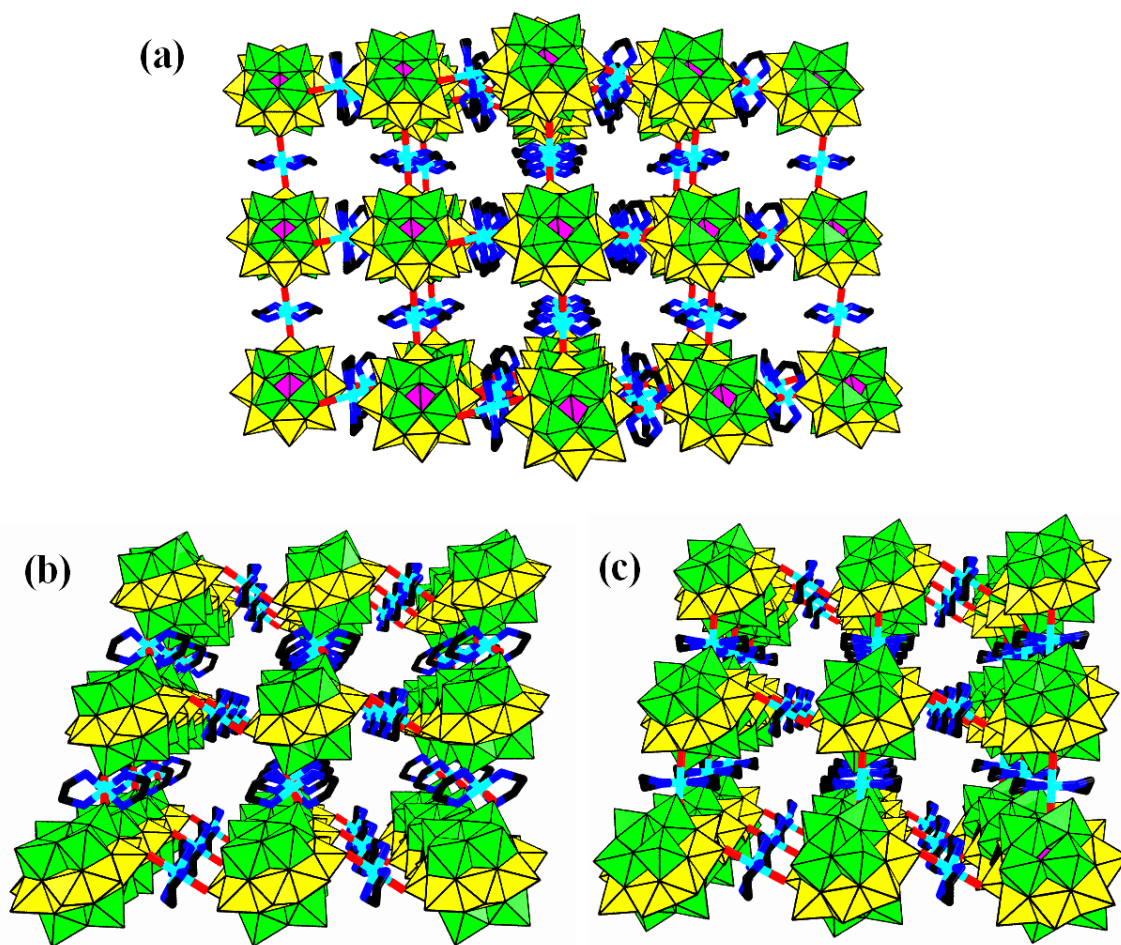

**Fig. S1.** 3D framework of compound 2 view along [100] (a), [010] (b), [-110] (c).

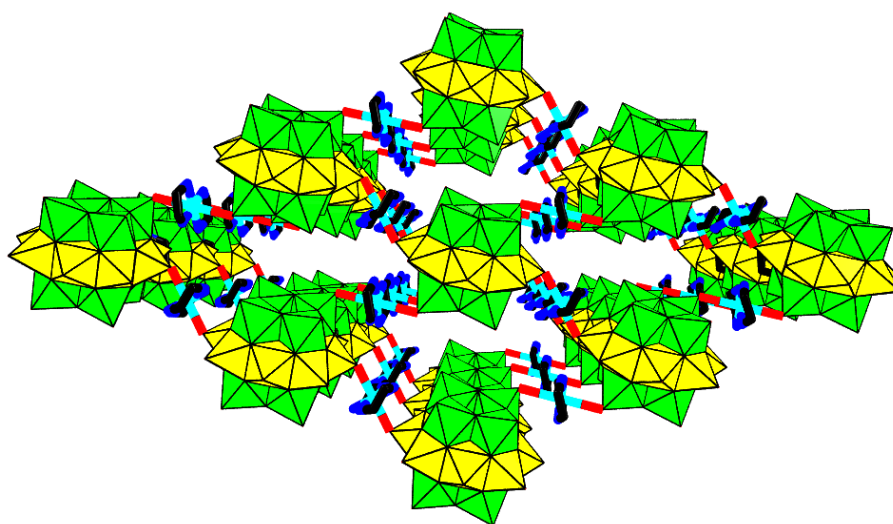

**Fig. S2.** 3D framework of compound 2 view along [001].

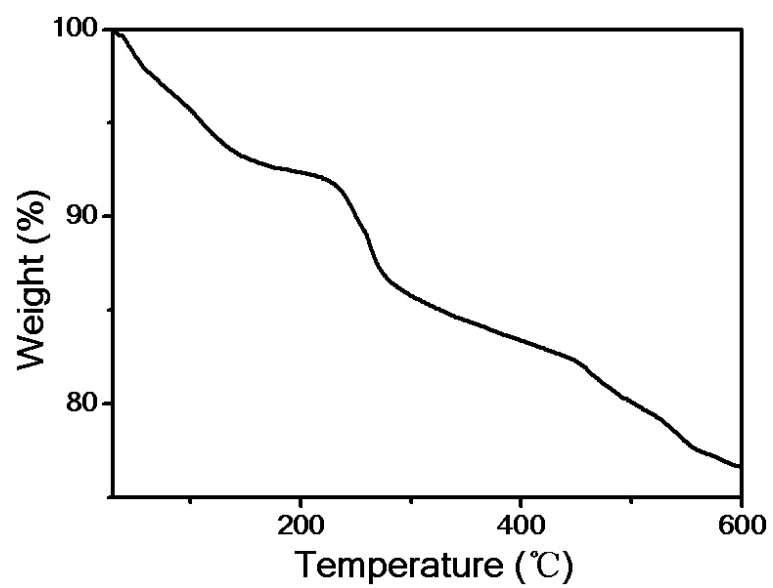

Fig. S3. TG curve for compound 1.

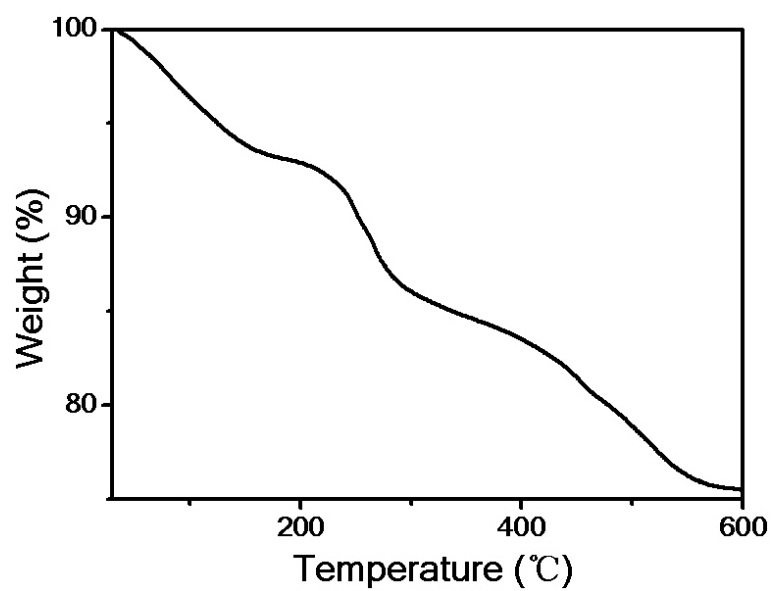

Fig. S4. TG curve for compound 2.

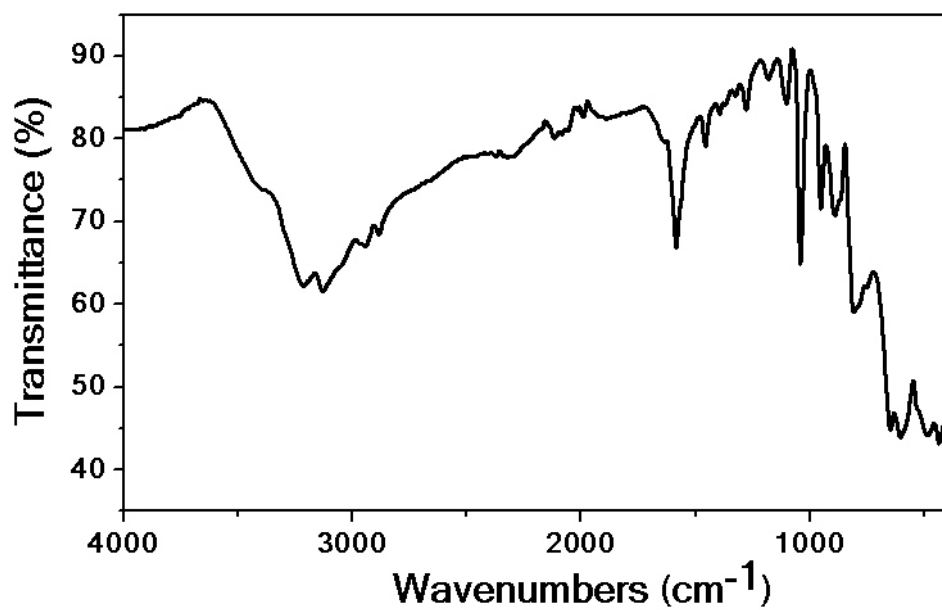

Fig. S5. IR spectrum of compound 1.

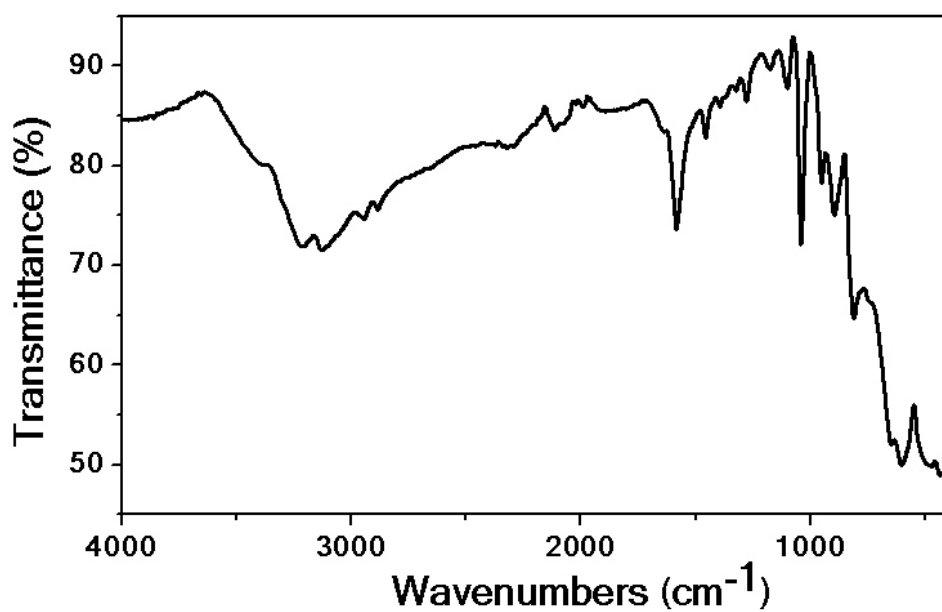

Fig. S6. IR spectrum of compound 2.

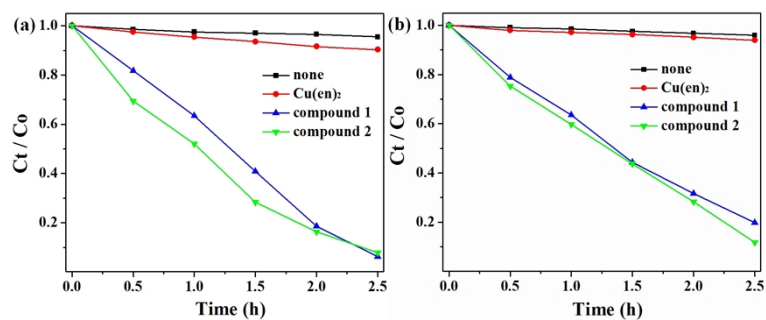

**Fig. S7.** Plots of  $C_t/C_0$  of MB (a) and RhB (b) versus irradiation time under UV light in the presence of compounds 1 and 2, the precursors  $\text{Cu}(\text{en})_2$  as well as in the absence of catalyst.

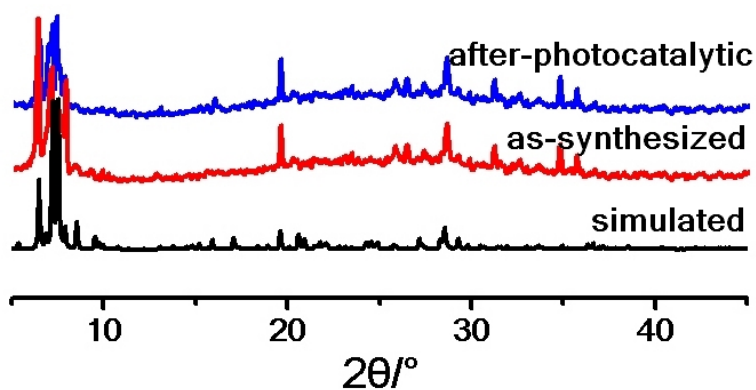

**Fig. S8.** The PXRD patterns of compound 1.

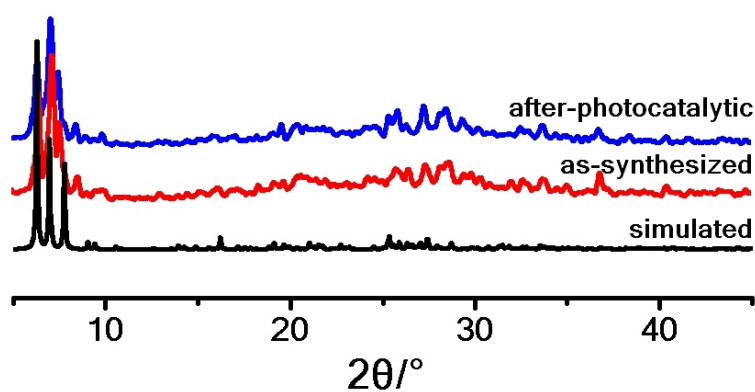

**Fig. S9.** The PXRD patterns of compound 2.

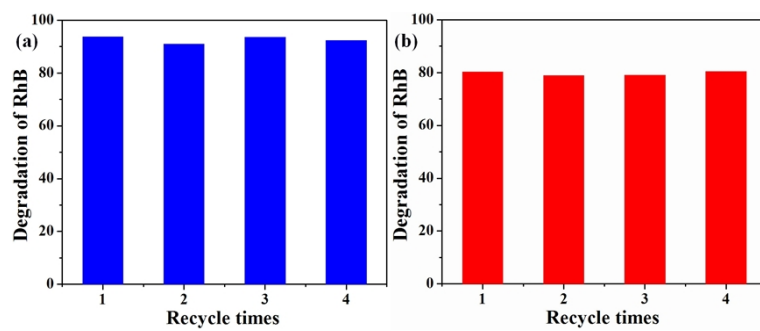

**Fig. S10.** Four recycles of photocatalytic degradation of MB (a) RhB (b) with compound 1.

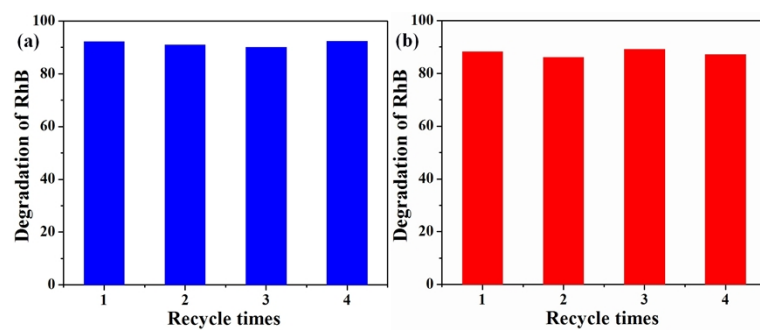

**Fig. S11.** Four cycles of photocatalytic degradation of MB (a) RhB (b) with compound 2.
